# Supplementary material for: ASCL1 is a MYCN- and LMO1-dependent member of the adrenergic neuroblastoma core regulatory circuitry
Source: PubMed Central journal article supplement (PMC6901540; doi:10.1038/s41467-019-13515-5), 2019-12-09
Supplement: 41467_2019_13515_MOESM2_ESM.pdf [file 41467_2019_13515_MOESM2_ESM.pdf]

## **Description of Additional Supplementary Files**

File Name: Supplementary Data 1

Description: List of genes significantly regulated after LMO1 knockdown

File Name: Supplementary Data 2

Description: List of direct target genes

File Name: Supplementary Data 3

Description: shRNA sequences

File Name: Supplementary Data 4

Description: qRT-PCR primer sequences

File Name: Supplementary Data 5

Description: sgRNA target sequences

File Name: Supplementary Data 6

Description: CHIP-PCR primer sequences

File Name: Supplementary Data 7

Description: Dataset accession numbers
